# Supplementary material for: Optimising the electrochemical reduction of CO2 to oxalic acid in propylene carbonate
Source: Royal Society of Chemistry journal article supplement (doi:10.1039/d3se00652b), 2023-01-01
Supplement: d3se00652b1.pdf [file d3se00652b1.pdf]

Supporting Information for:

## Optimising the Electrochemical Reduction of CO<sub>2</sub> to Oxalic Acid in Propylene Carbonate

Halilu Sale<sup>1,2</sup>, Gangi Reddy Ubbara<sup>1</sup>, Mark D. Symes<sup>1\*</sup>

1. WestCHEM, School of Chemistry, University of Glasgow, G12 8QQ Glasgow, UK.

2. Energy Commission of Nigeria, Plot 701c Garki-Abuja, Nigeria

\*Corresponding Author: [Mark.Symes@glasgow.ac.uk](mailto:Mark.Symes@glasgow.ac.uk)

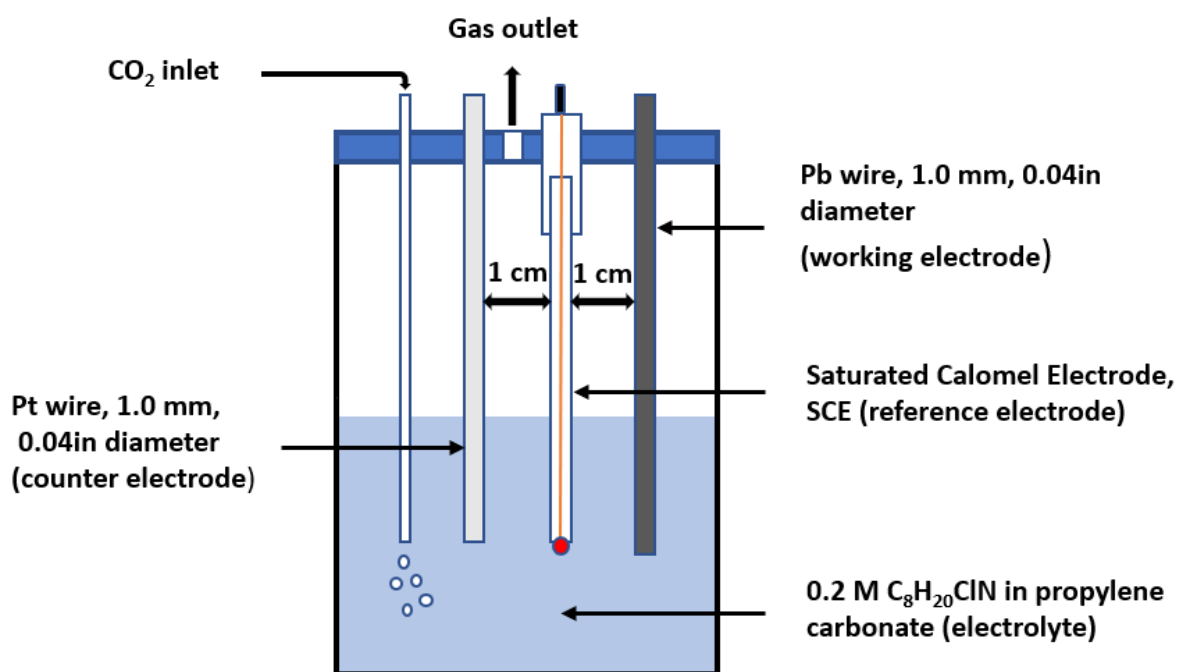

**Figure S1:** Schematic diagram of the single-cell experimental set-up used for the cyclic voltammetry experiments, using lead as a working electrode, platinum as a counter electrode and a saturated calomel electrode as the reference electrode at a temperature of 25 °C.

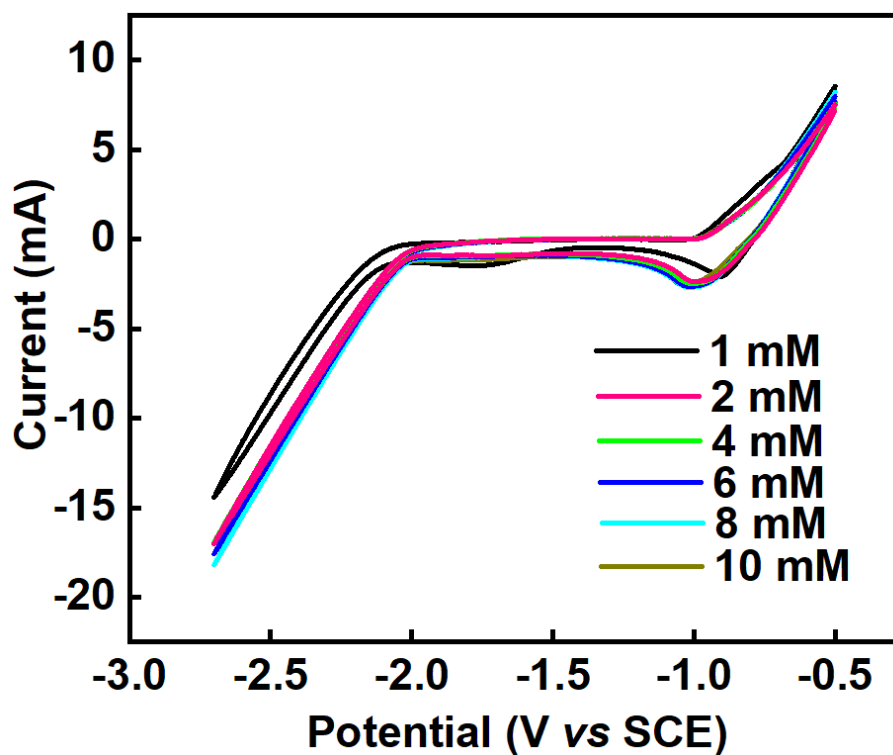

**Figure S2:** Cyclic voltammetry investigating the optimum concentration of the benzonitrile electrocatalyst needed for the electrochemical reduction of  $\text{CO}_2$  in propylene carbonate, using lead as a working electrode with a surface area of  $1.40 \text{ cm}^2$ , platinum as a counter electrode and a saturated calomel electrode as the reference electrode at a temperature of  $25 \text{ }^\circ\text{C}$  and scan rate of  $50 \text{ mV/s}$ .

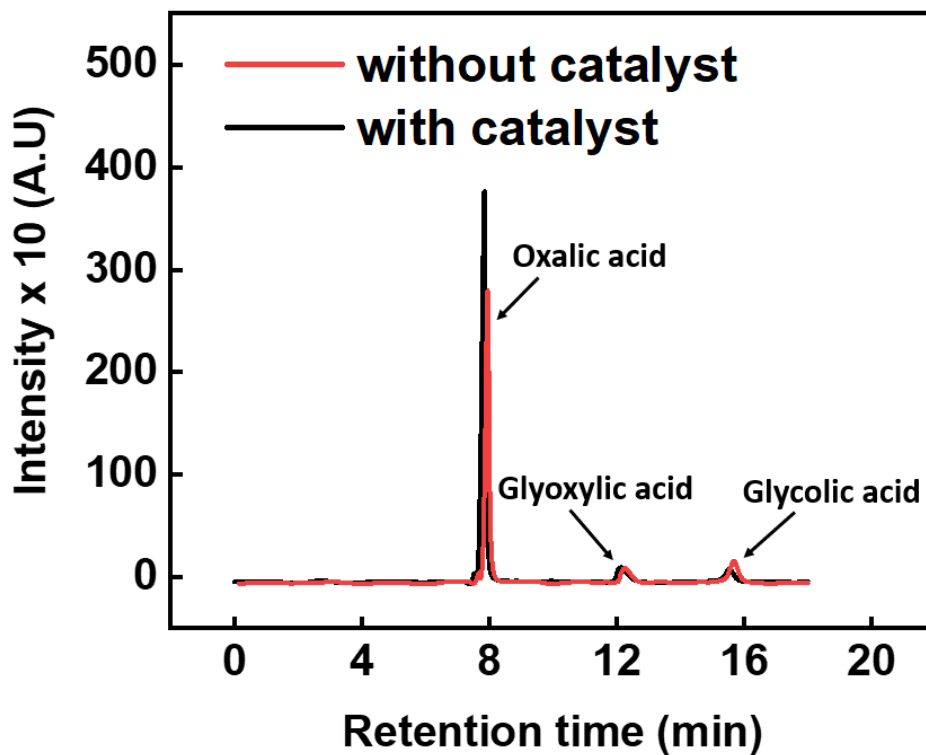

**Figure S3:** Example HPLC signal showing the chromatograms retention time for the carboxylic acids detected at  $-2.2$  (V vs SCE) in propylene carbonate (red) and propylene carbonate/benzonitrile (black).

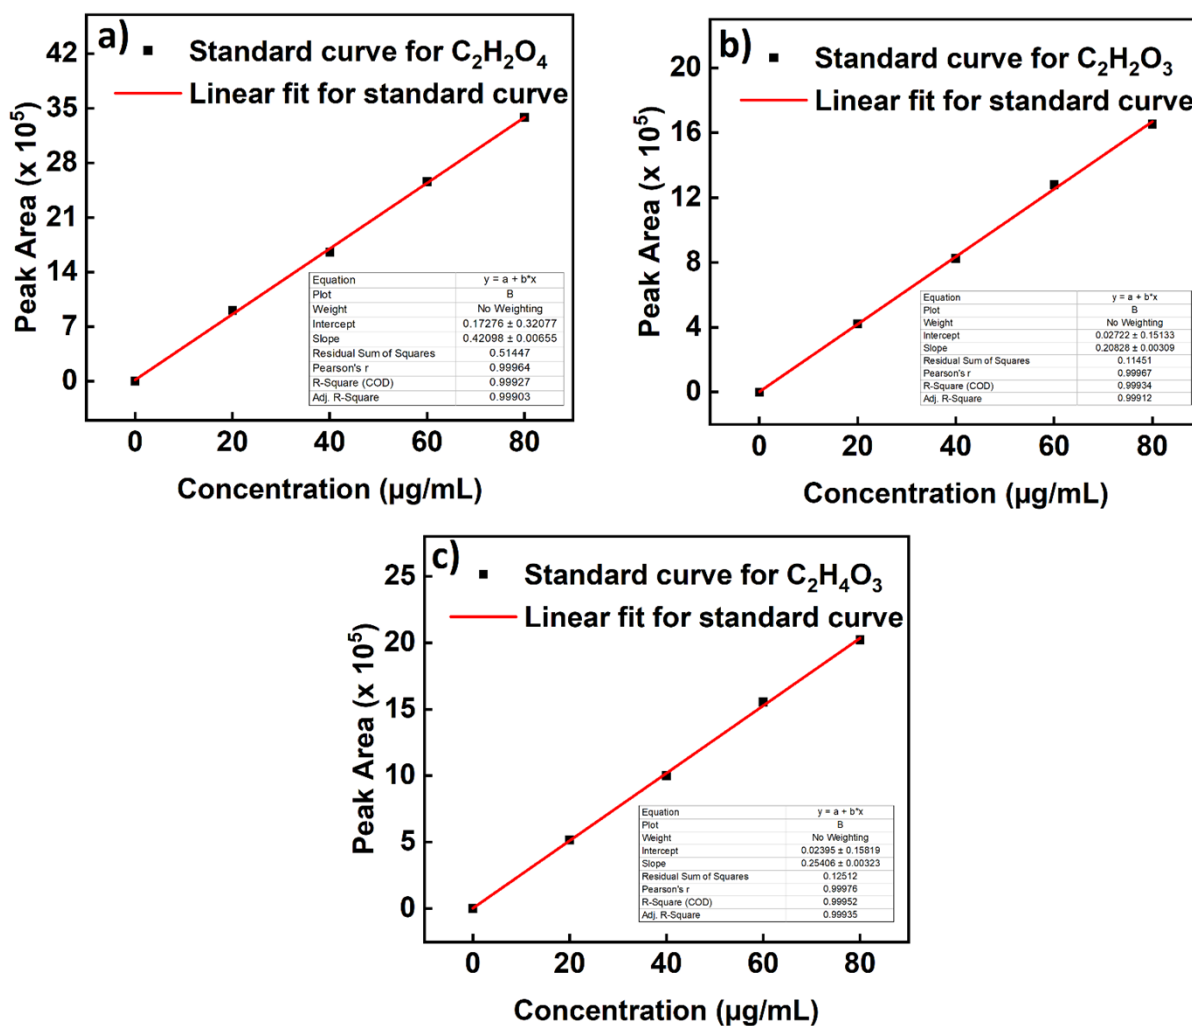

**Figure S4:** Calibration curves for (a) Oxalic acid, (b) glyoxylic acid and (c) glycolic acid obtained from HPLC analysis of the standard solutions of the respective carboxylic acids.

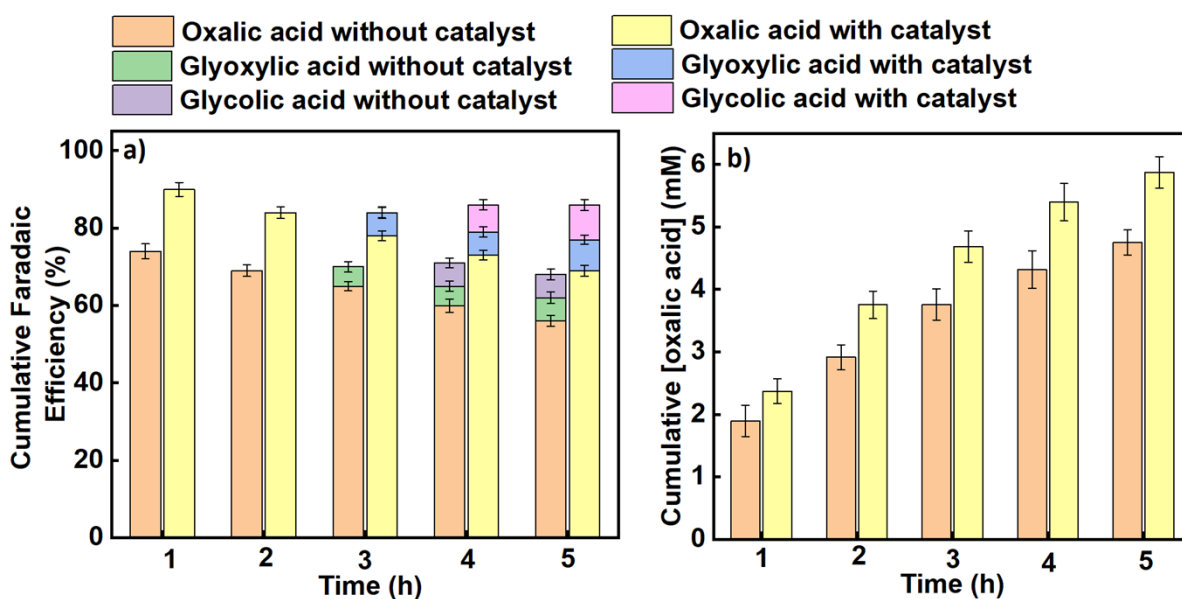

**Figure S5:** The effect of benzonitrile on (a) the cumulative Faradaic efficiencies for the production of oxalic acid and its accompanying by-products in propylene carbonate, (b) the cumulative concentration of oxalic acid formed using Pb as a working electrode and Pt foil as a counter electrode at an applied potential of  $-2.3$  V vs SCE in an H-cell at a temperature of  $25$  °C. Triplicate experiments were performed to obtain the error margin, and the results are calculated as the mean  $\pm$  standard deviation ( $n = 3$ ).

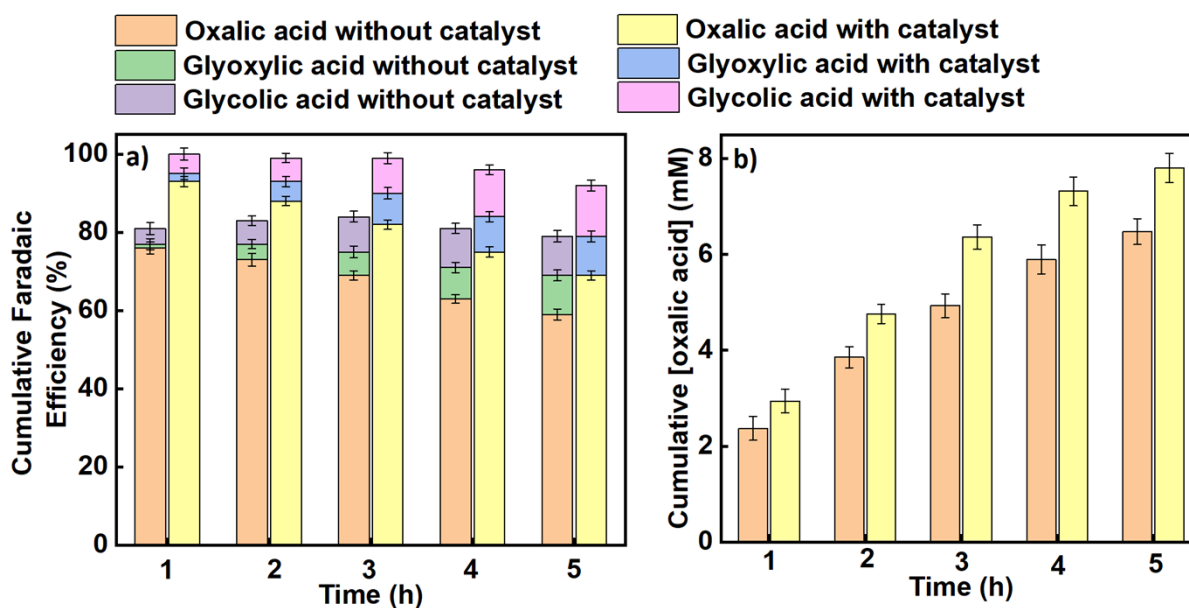

**Figure S6:** The effect of benzonitrile on (a) the cumulative Faradaic efficiencies for the production of oxalic acid and its accompanying by-products in propylene carbonate, (b) the cumulative concentration of oxalic acid formed using Pb as a working electrode and Pt foil as a counter electrode at an applied potential of  $-2.4$  V vs SCE in an H-cell at a temperature of  $25$  °C. Triplicate experiments were performed to obtain the error margin, and the results are calculated as the mean  $\pm$  standard deviation ( $n = 3$ ).

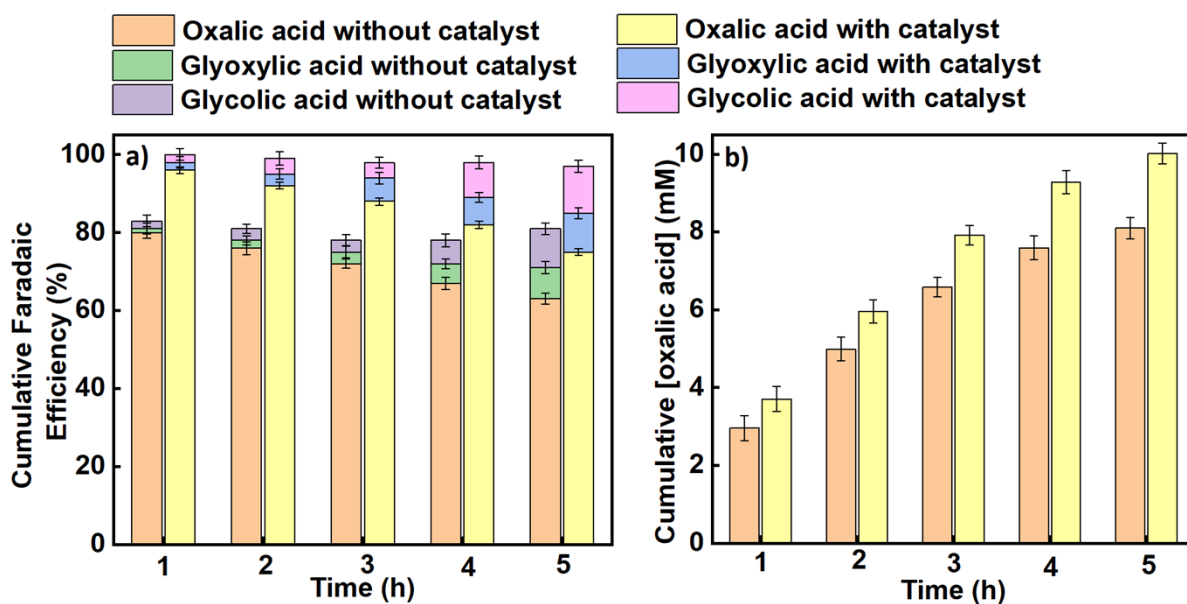

**Figure S7:** The effect of benzonitrile on (a) the cumulative Faradaic efficiencies for the production of oxalic acid and its accompanying by-products in propylene carbonate, (b) the cumulative concentration of oxalic acid formed using Pb as a working electrode and Pt foil as a counter electrode at an applied potential of  $-2.5$  V vs SCE in an H-cell at a temperature of  $25$  °C. Triplicate experiments were performed to obtain the error margin and the results are calculated as the mean  $\pm$  standard deviation ( $n = 3$ ).

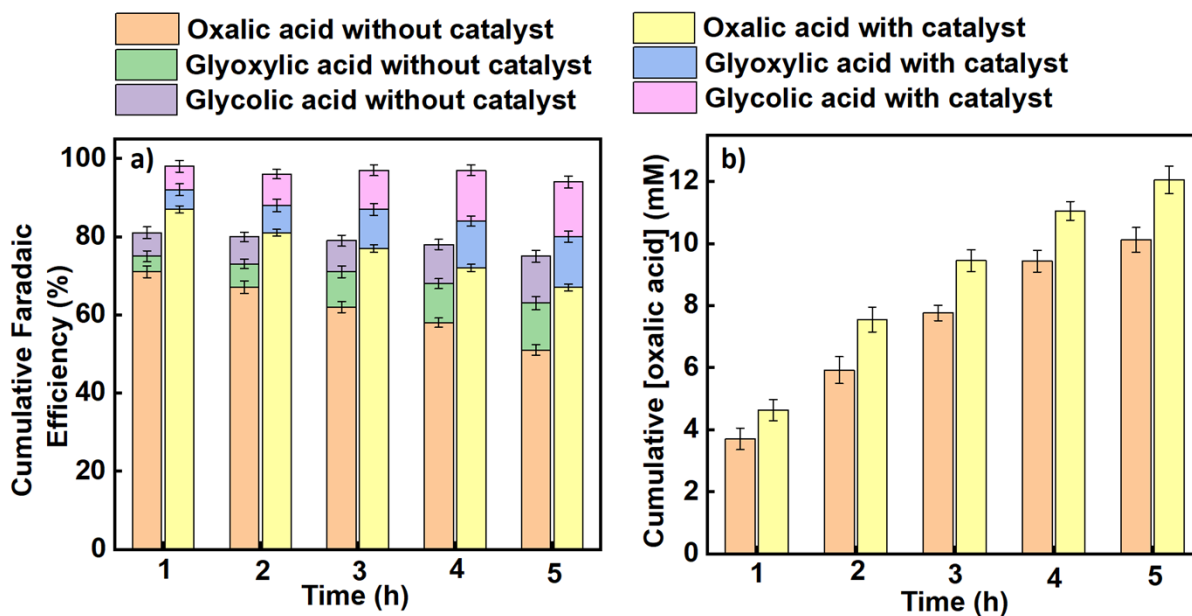

**Figure S8:** The effect of benzonitrile on (a) the cumulative Faradaic efficiencies for the production of oxalic acid and its accompanying by-products in propylene carbonate, (b) the cumulative concentration of oxalic acid formed using Pb as a working electrode and Pt foil as a counter electrode at an applied potential of  $-2.6$  V vs SCE in an H-cell at a temperature of  $25$  °C. Triplicate experiments were performed to obtain the error margin and the results are calculated as the mean  $\pm$  standard deviation ( $n = 3$ ).

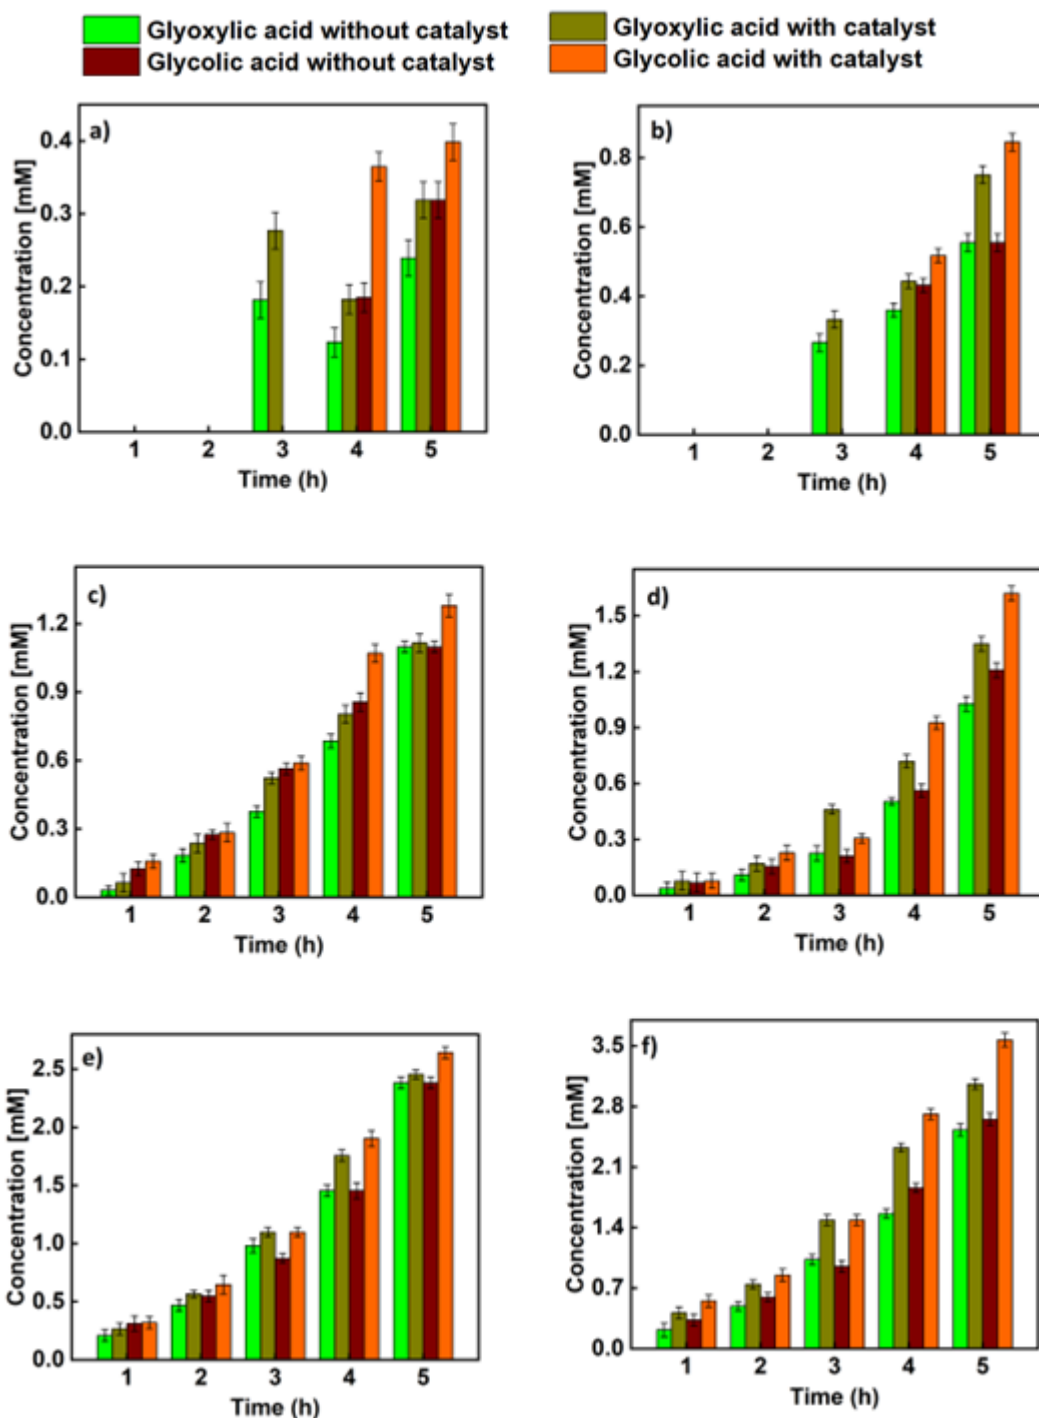

**Figure S9:** The concentration of notable by-products accompanying the electrochemical reduction of  $\text{CO}_2$  to oxalic acid in propylene carbonate and propylene carbonate/benzonitrile on a Pb cathode at an applied potential of a)  $-2.2$  V, b)  $-2.3$  V, c)  $-2.4$  V, d)  $-2.5$  V, e)  $-2.6$  V, f)  $-2.7$  V vs. SCE in an H-cell at  $25^\circ\text{C}$  for 5 hours.

**Table S1:** The effect of benzonitrile on current densities for electrochemical reduction of CO<sub>2</sub> to oxalic acid in propylene carbonate on a Pb cathode at an applied potential of -2.2 to -2.7 (V vs. SCE) in an H-cell at 25 °C, averaged over 5 hours.

| Entry | Applied Potential (V vs SCE) | Average Current Density (mA/cm <sup>2</sup> ) |               |
|-------|------------------------------|-----------------------------------------------|---------------|
|       |                              | Without catalyst                              | With catalyst |
| 1     | -2.2                         | -4.49                                         | -5.11         |
| 2     | -2.3                         | -5.61                                         | -7.10         |
| 3     | -2.4                         | -7.00                                         | -8.71         |
| 4     | -2.5                         | -8.77                                         | -10.96        |
| 5     | -2.6                         | -11.0                                         | -13.68        |
| 6     | -2.7                         | -13.7                                         | -16.90        |

**Table S2:** The effect of benzonitrile on the average Faradaic efficiencies of the notable products of electrochemical reduction of CO<sub>2</sub> to oxalic acid in propylene carbonate on a Pb cathode at an applied potential of -2.2 to -2.7 (V vs. SCE) in an H-cell at 25 °C, averaged over

| Entry | Applied Potential (V vs SCE) | Average Faradaic Efficiency of the Products (%) |               |                  |               |                  |               |
|-------|------------------------------|-------------------------------------------------|---------------|------------------|---------------|------------------|---------------|
|       |                              | Oxalic Acid                                     |               | Glyoxylic Acid   |               | Glycolic Acid    |               |
|       |                              | Without catalyst                                | With catalyst | Without catalyst | With catalyst | Without catalyst | With catalyst |
| 1     | -2.2                         | 61.17                                           | 75.40         | 1.80             | 2.60          | 1.40             | 2.25          |
| 2     | -2.3                         | 64.40                                           | 78.84         | 3.20             | 4.0           | 2.40             | 3.20          |
| 3     | -2.4                         | 68.22                                           | 82.25         | 5.80             | 6.83          | 7.80             | 9.01          |
| 4     | -2.5                         | 71.60                                           | 86.60         | 3.80             | 5.60          | 4.8              | 6.20          |
| 5     | -2.6                         | 63.80                                           | 77.80         | 8.2              | 9.40          | 8.60             | 10.20         |
| 6     | -2.7                         | 59.60                                           | 72.40         | 8.2              | 9.40          | 9.2              | 10.8          |

5 hours.

**Table S3:** The effect of benzonitrile on the yield of the notable products of electrochemical reduction CO<sub>2</sub> in propylene carbonate on a Pb cathode at an applied potential of -2.2 to -2.7 (V vs. SCE) in an H-cell at 25 °C, averaged over 5 hours.

| Entry | Applied Potential (V vs SCE) | Product Concentration (mM) |               |                  |               |                  |               |
|-------|------------------------------|----------------------------|---------------|------------------|---------------|------------------|---------------|
|       |                              | Oxalic Acid                |               | Glyoxylic Acid   |               | Glycolic Acid    |               |
|       |                              | Without catalyst           | With catalyst | Without catalyst | With catalyst | Without catalyst | With catalyst |
| 1     | -2.2                         | 4.05                       | 4.68          | 0.23             | 0.31          | 0.35             | 0.39          |
| 2     | -2.3                         | 4.75                       | 5.88          | 0.56             | 0.75          | 0.60             | 0.84          |
| 3     | -2.4                         | 6.47                       | 7.81          | 1.09             | 1.11          | 1.09             | 1.45          |
| 4     | -2.5                         | 8.10                       | 10.12         | 1.12             | 1.35          | 1.21             | 1.62          |
| 5     | -2.6                         | 10.14                      | 12.05         | 2.38             | 2.45          | 2.38             | 2.64          |
| 6     | -2.7                         | 12.65                      | 15.81         | 2.53             | 3.06          | 2.65             | 3.57          |
